# Supplementary material for: Alloying-assisted phonon engineering of layered BiInSe3@nickel foam for efficient solar-enabled water evaporation
Source: Royal Society of Chemistry journal article supplement (doi:10.1039/c7nr04374k), 2017-01-01
Supplement: c7nr04374k1.pdf [file c7nr04374k1.pdf]

## Supplementary Information for

### **Alloying-assisted Phonon Engineering of Layered BiInSe<sub>3</sub>@Nickel Foam for Efficient Solar-enabled Water Evaporation**

J. D. Yao, Z. Q. Zheng and G. W. Yang\*

State Key Laboratory of Optoelectronic Materials and Technologies, Nanotechnology  
Research Center, School of Materials Science & Engineering, School of Physics, Sun  
Yat-sen University, Guangzhou 510275, Guangdong, P. R. China.

\*Corresponding author: [stsygw@mail.sysu.edu.cn](mailto:stsygw@mail.sysu.edu.cn)

**S1. Experimental setup of the PLD system.**

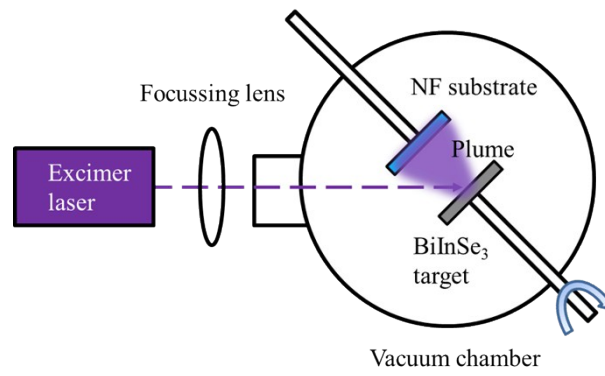

Fig. S1. Experimental setup of the PLD system.

## S2. AFM thickness profile of the PLD-grown BiInSe<sub>3</sub>.

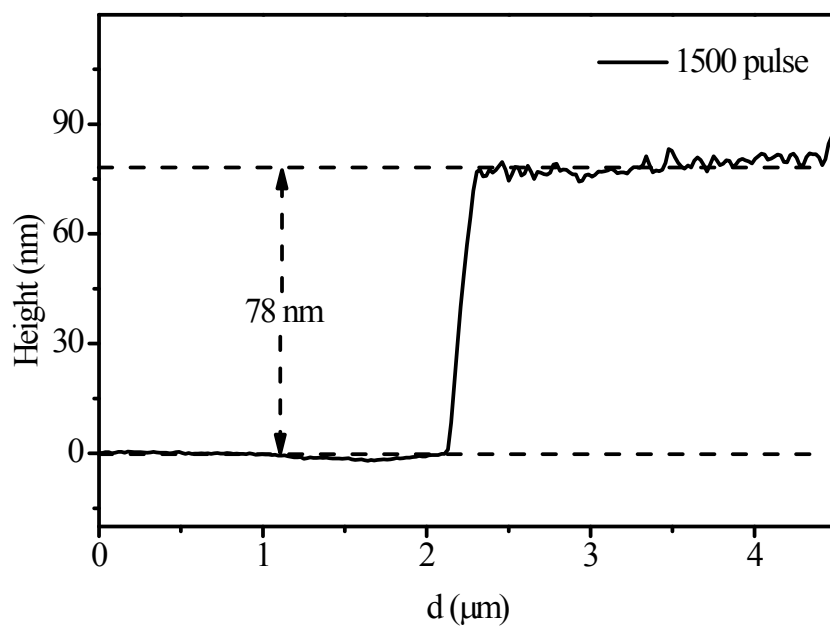

Fig. S2. AFM thickness profile of the PLD-grown BiInSe<sub>3</sub> film with a laser pulse number of 1500.

### S3. Digital photograph and SEM image of pure NF.

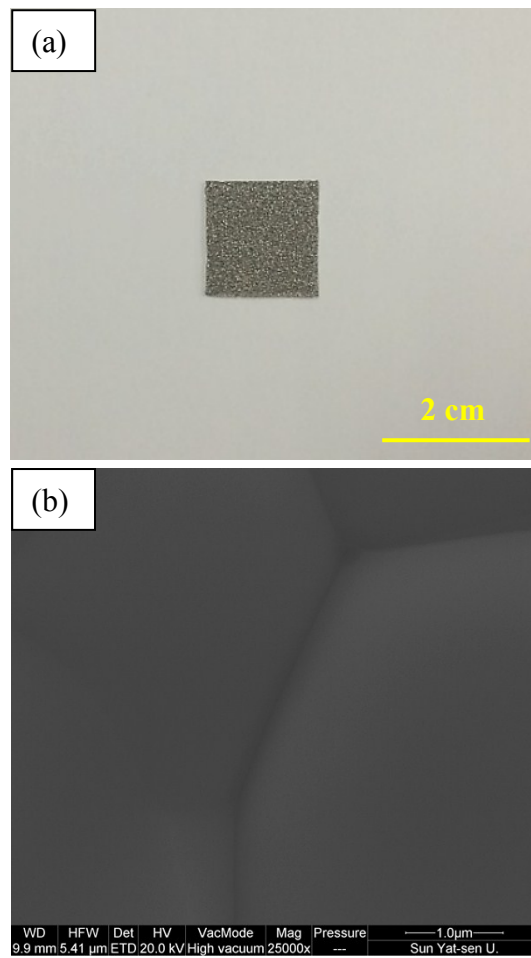

Fig. S3. (a) Digital photograph of pure NF. Scale bar: 2 cm. (b) High-magnification SEM image. Scale bar: 1 μm .

**S4. Full spectrum XPS scan of the PLD-grown BiInSe<sub>3</sub>.**

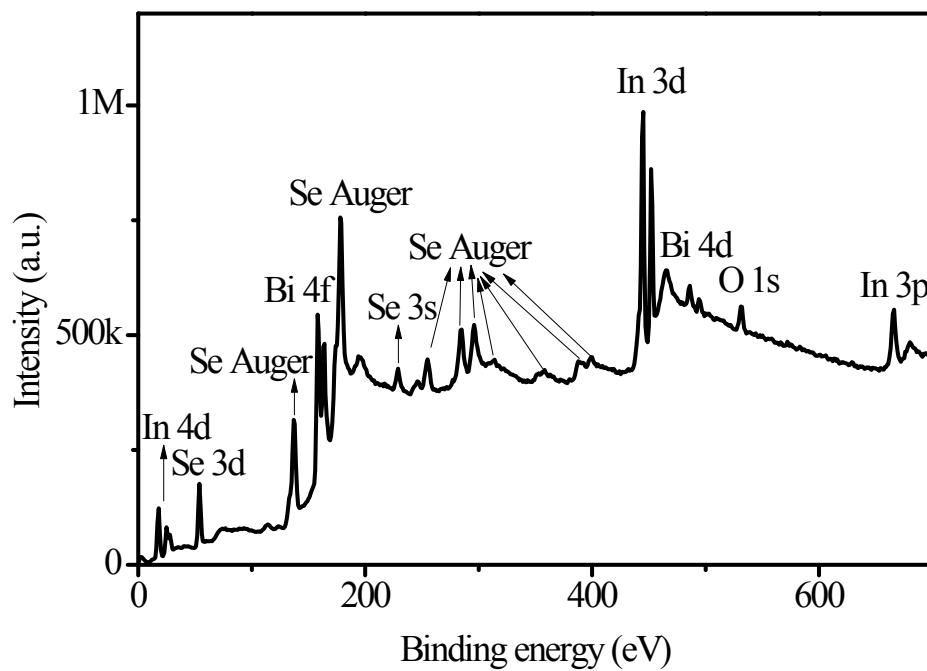

Fig. S4. Full spectrum XPS scan of the PLD-grown BiInSe<sub>3</sub>.

**S5. Reflectance spectrum of pure NF and BiInSe<sub>3</sub>@NF in the solar spectrum range.**

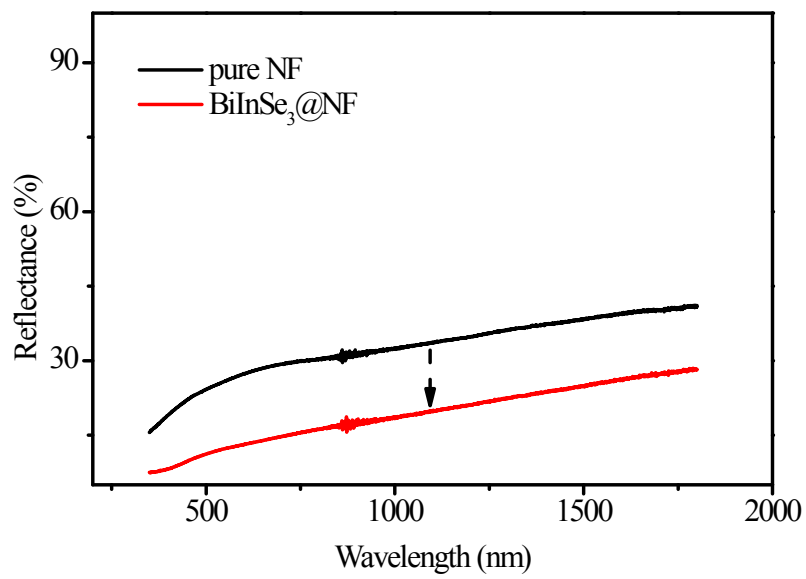

Fig. S5. Reflectance spectrum of pure NF and BiInSe<sub>3</sub>@NF in the solar spectrum range.

### S6. Photothermal imaging mappings of the evaporation system.

Temperature of the system was systematically monitored. Before irradiation, the whole container remained a uniform and low temperature. After irradiation was on, temperature of BiInSe<sub>3</sub>@NF photothermal converter (bottom of the container) increased first, while that of the upper water remained relatively unchanged. As time went by, high-temperature region gradually spread from BiInSe<sub>3</sub>@NF photothermal converter to surrounding water and finally throughout the whole container.

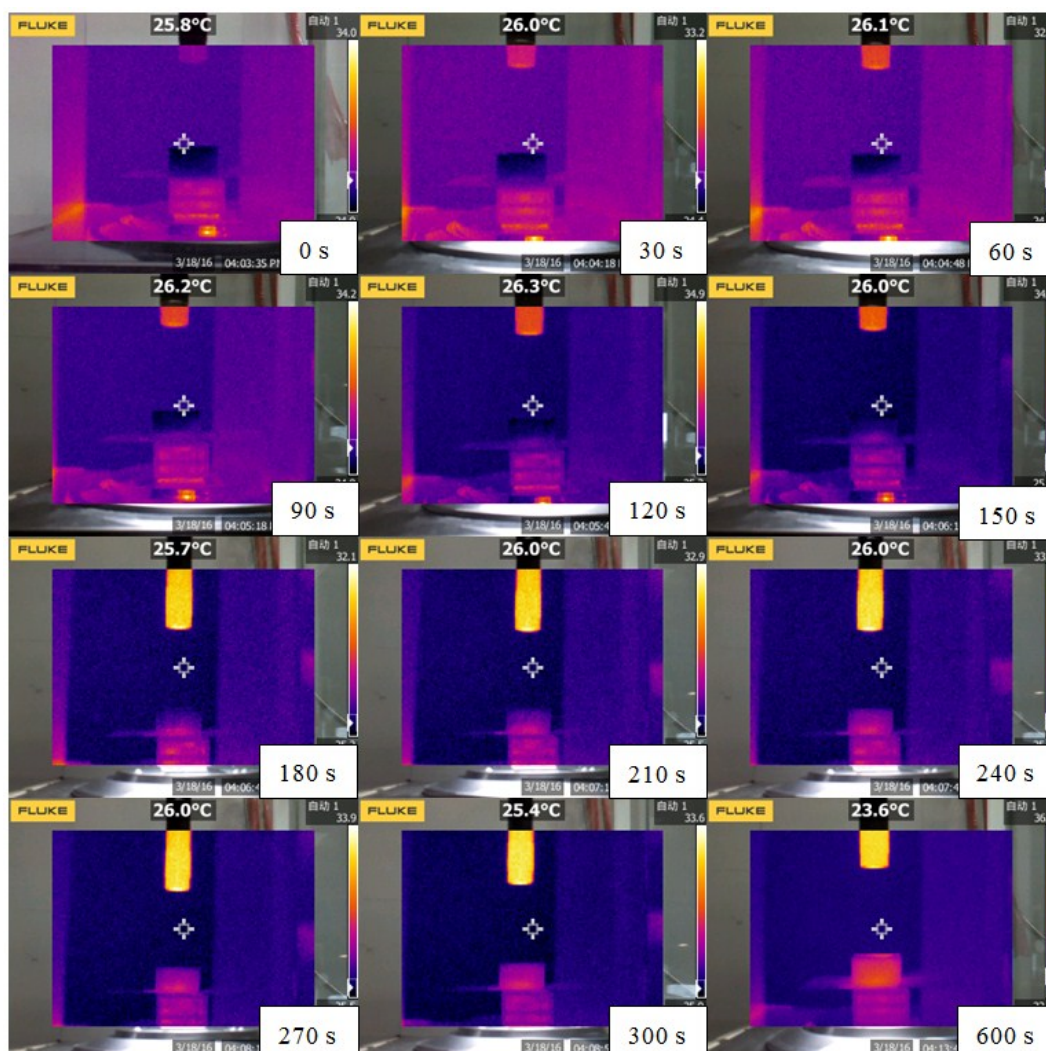

Fig. S6. Photothermal imaging mappings of the evaporation system.

## S7. Summary of recent studies on solar energy driven water evaporation.

**Table I**

| Evaporater                                      | $E_{\text{Water}}$<br>(kg m <sup>-2</sup> h <sup>-1</sup> ) | $E_{\text{Evap}}$<br>(kg m <sup>-2</sup> h <sup>-1</sup> ) | $E_{\text{Nor}}$ | Ref             |
|-------------------------------------------------|-------------------------------------------------------------|------------------------------------------------------------|------------------|-----------------|
| <b>BiInSe<sub>3</sub>@NF</b>                    | <b>0.33</b>                                                 | <b>0.83</b>                                                | <b>2.5</b>       | <b>our work</b> |
| <b>Black TiO<sub>2</sub>@SS mesh</b>            | 0.5195                                                      | 0.8012                                                     | 1.54             | 1               |
| <b>Gold-particle-assembly@NPT</b>               | 0.28                                                        | 0.63                                                       | 2.25             | 2               |
| <b>Gold-particle-assembly@NPT</b>               | 0.38                                                        | 0.8                                                        | 2.1              | 3               |
| <b>Black titania</b>                            | 0.56                                                        | 1.12                                                       | 2                | 4               |
| <b>Cauliflower-shaped copper nanostructures</b> | ND                                                          | ND                                                         | 2                | 5               |
| <b>Biomimetic nanoparticles</b>                 | 0.44                                                        | 0.8                                                        | 1.8              | 6               |
| <b>Carbon-black-based gauze</b>                 | ND                                                          | ND                                                         | 1.57             | 7               |
| <b>Fe<sub>3</sub>O<sub>4</sub>/C particles</b>  | ND                                                          | ND                                                         | 1.9              | 8               |

ND: no data.



**S8. Absorption coefficient of BiInSe<sub>3</sub> over the solar spectrum range.**

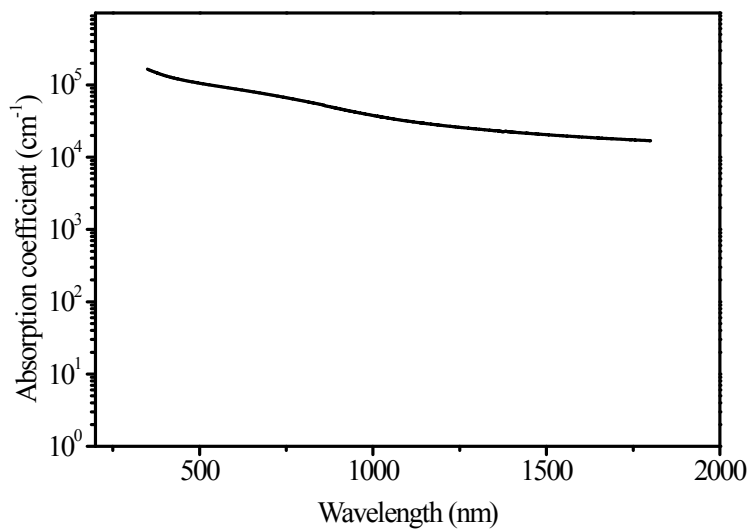

Fig. S7. Absorption coefficient of BiInSe<sub>3</sub> over the solar spectrum range.

**S9. I-V curves in dark and under illumination of a BiInSe<sub>3</sub> photodetector.**

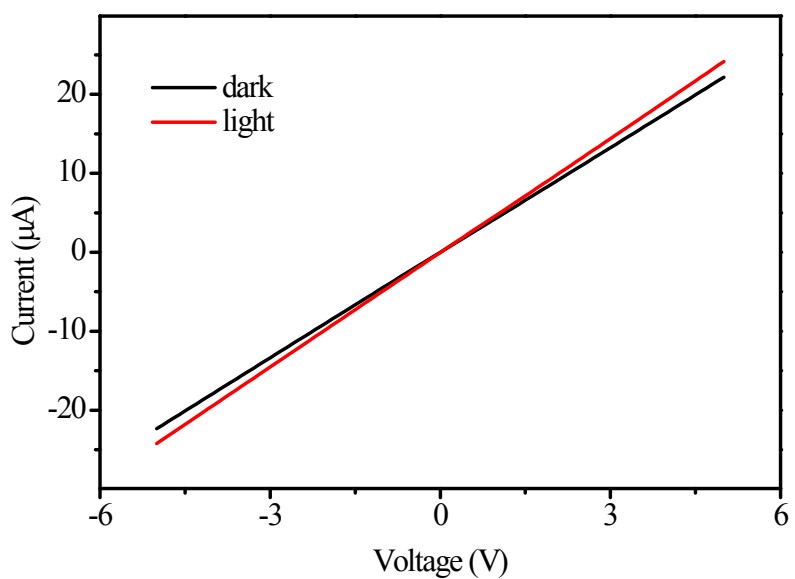

Fig. S8. I-V curves in dark and under illumination of a BiInSe<sub>3</sub> photodetector.

Wavelength: 635 nm. Power density: 30 mW/cm<sup>2</sup>.

## References

- 1 M. Ye, J. Jia, Z. Wu, C. Qian, R. Chen, P. G. O'Brien, W. Sun, Y. Dong and G. A. Ozin, *Adv. Energy Mater.*, 2017, **7**, 201601811.
- 2 L. Zhou, S. Zhuang, C. He, Y. Tan, Z. Wang and J. Zhu, *Nano Energy*, 2017, **32**, 195-200.
- 3 L. Zhou, Y. Tan, D. Ji, B. Zhu, P. Zhang, J. Xu, Q. Gan, Z. Yu and J. Zhu, *Sci. Adv.*, 2016, **2**, 1501227.
- 4 G. Zhu, J. Xu, W. Zhao and F. Huang, *ACS Appl. Mater. Interfaces*, 2016, **8**, 31716-31721.
- 5 P. Fan, H. Wu, M. Zhong, H. Zhang, B. Bai and G. Jin, *Nanoscale*, 2016, **8**, 14617-14624.
- 6 C. Liu, J. Huang, C. E. Hsiung, Y. Tian, J. Wang, Y. Han and A. Fratalocchi, *Advanced Sustainable Systems*, 2017, **1**, 1600013.
- 7 Y. Liu, J. Chen, D. Guo, M. Cao and L. Jiang, *ACS Appl. Mater. Interfaces*, 2015, **7**, 13645-13652.
- 8 Y. Zeng, J. Yao, B. A. Horri, K. Wang, Y. Wu, D. Li and H. Wang, *Energy Environ. Sci.*, 2011, **4**, 4074-4078.
